# Supplementary material for: The RNA Export Factor, Nxt1, Is Required for Tissue Specific Transcriptional Regulation
Source: PubMed Central journal article supplement (PMC3674997; doi:10.1371/journal.pgen.1003526), 2013-06-06
Supplement: pgen.1003526.s001.pdf [file pgen.1003526.s001.pdf]

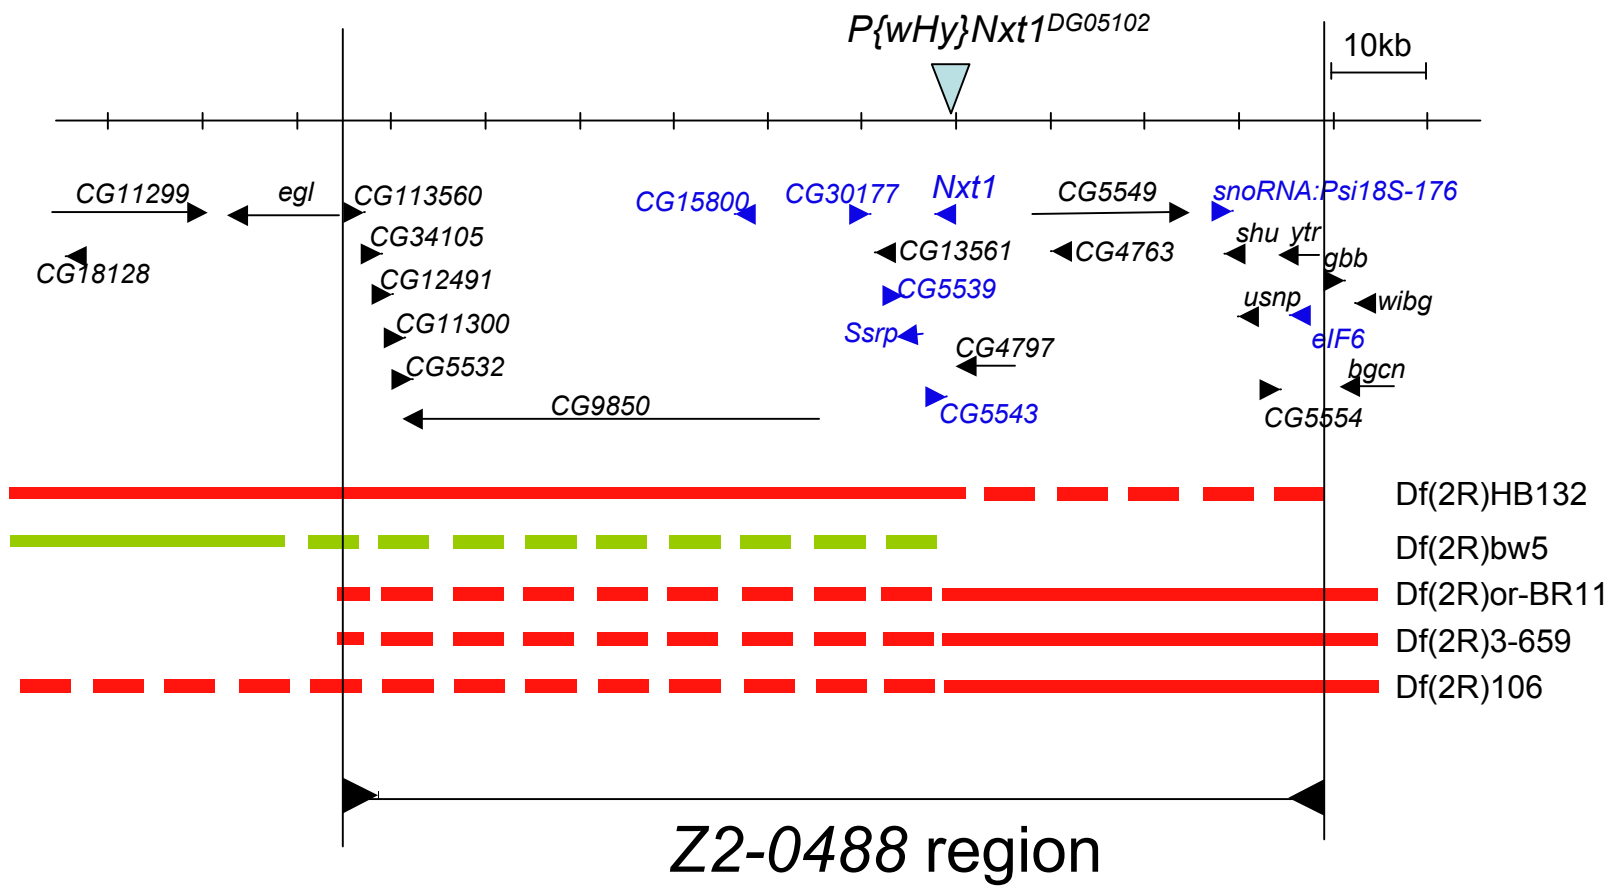

█ Does not uncover Z2-0488

█ Uncovers Z2-0488
