# Supplementary material for: The RNA Export Factor, Nxt1, Is Required for Tissue Specific Transcriptional Regulation
Source: PubMed Central journal article supplement (PMC3674997; doi:10.1371/journal.pgen.1003526), 2013-06-06

- ⬡ tTAF subunits
- Probes unaltered in *Nxt1*
- Probes 4x down in *Nxt1*
- Probes 8x down in *Nxt1*
- Probes 16x down in *Nxt1*

- ⬡ tMAC subunits
- Probes unaltered in *aly*
- Probes 4x down in *aly*
- Probes 8x down in *aly*
- Probes 16x down in *aly*

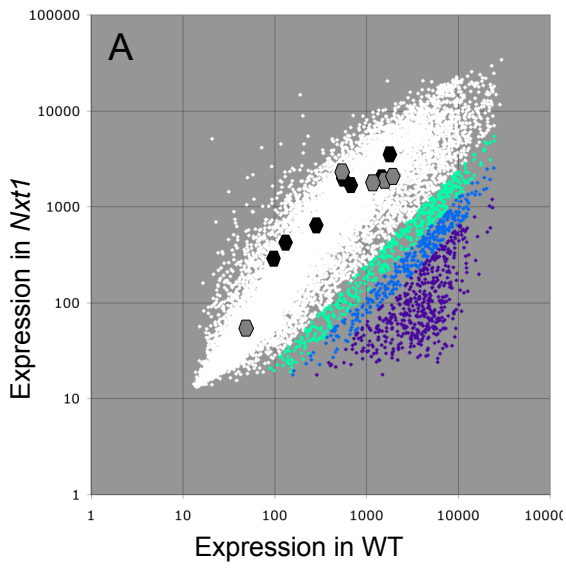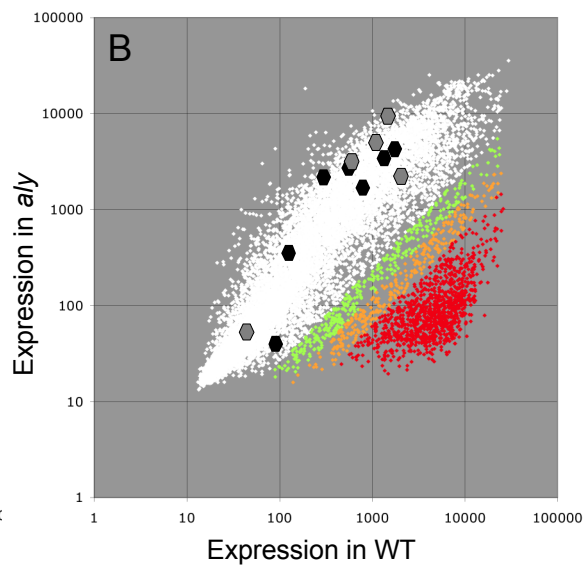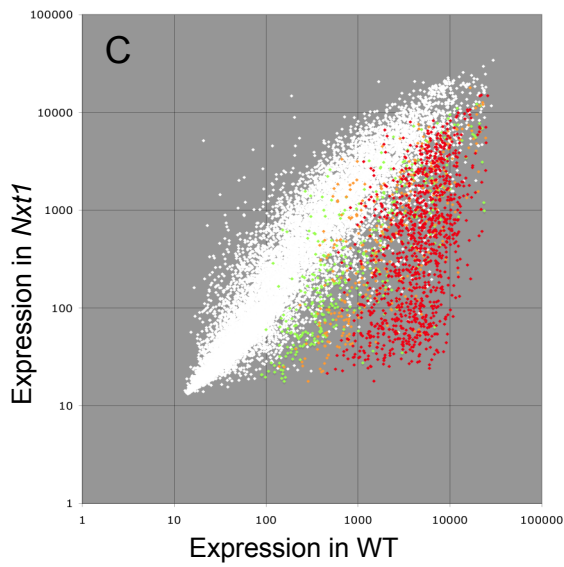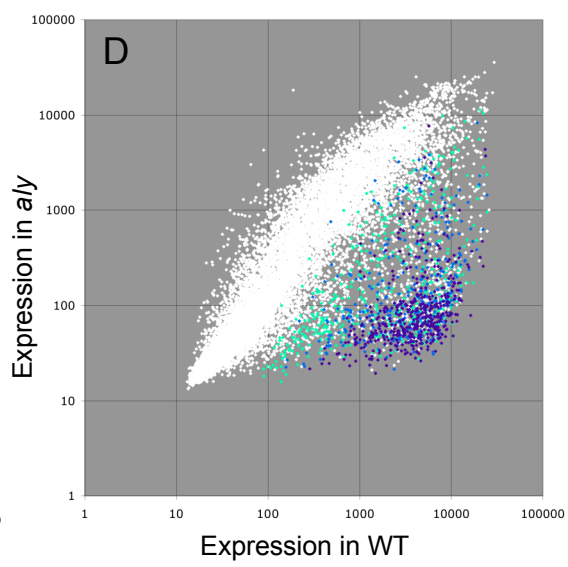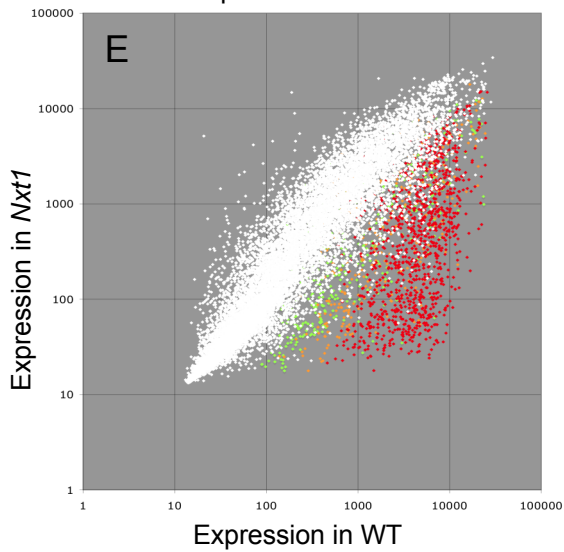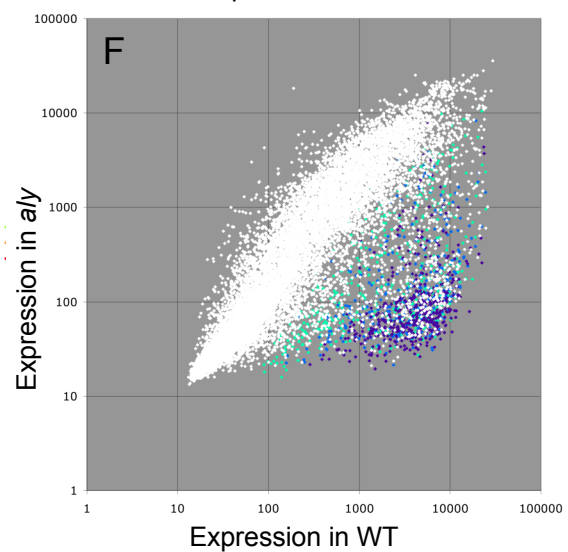

Supplement: pgen.1003526.s002.pdf [file pgen.1003526.s002.pdf]
